# Supplementary material for: Spin crossover in the Fe(3PyMe) 2 [M(CN) 4 ] series with M = Ni, Pd, Pt, and 3PyMe = 3-pyridinemethanol. The role of the intermolecular OH⋯OH interaction
Source: Royal Society of Chemistry journal article supplement (doi:10.1039/d5nj00335k), 2025-01-01
Supplement: d5nj00335k1.pdf [file d5nj00335k1.pdf]

Electronic Supplementary Information (ESI) for “Spin crossover in the  $\text{Fe}(\text{3PyMe})_2[\text{M}(\text{CN})_4]$  series with  $\text{M} = \text{Ni}, \text{Pd}, \text{Pt}$ , and  $\text{3PyMe} = 3\text{-pyridinemethanol}$ . The role of intermolecular interactions”.

M. C. Vázquez, Y. Avila, L. Sánchez, A. Ortiz, O. Piedra, M. González, M. Ávila\*, E. Reguera\*

Instituto Politécnico Nacional, Centro de Investigación en Ciencia Aplicada y Tecnología Avanzada, Unidad Legaria, 11500 Mexico City, Mexico.

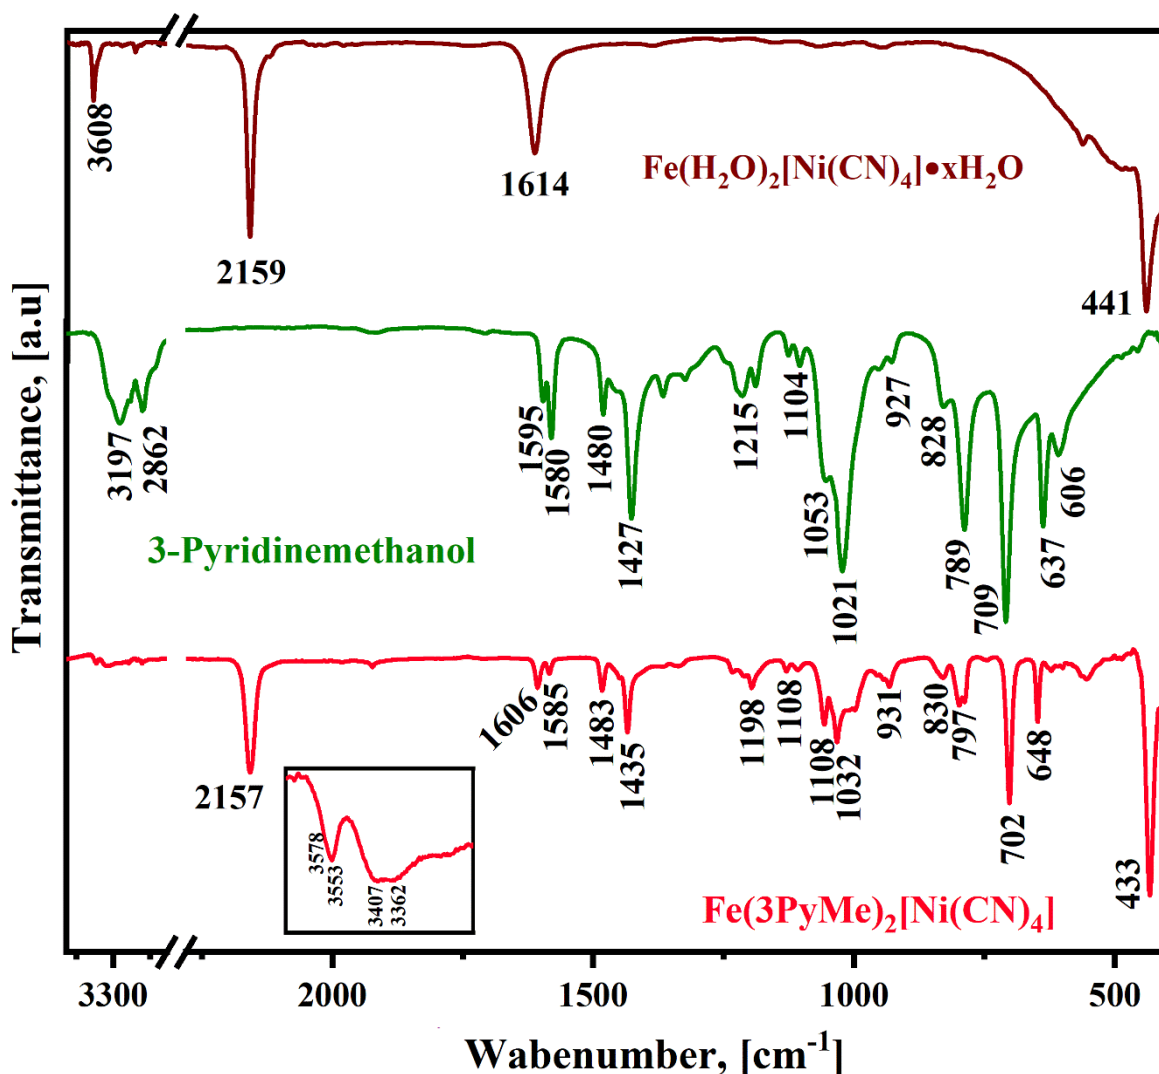

Figure S1. IR spectra for  $\text{Fe}(\text{H}_2\text{O})_2[\text{Ni}(\text{CN})_4] \cdot x\text{H}_2\text{O}$ ; 3-pyridine methanol as a pillar molecule; and the formed solid by incorporation of bimolecular pillars between adjacent layers

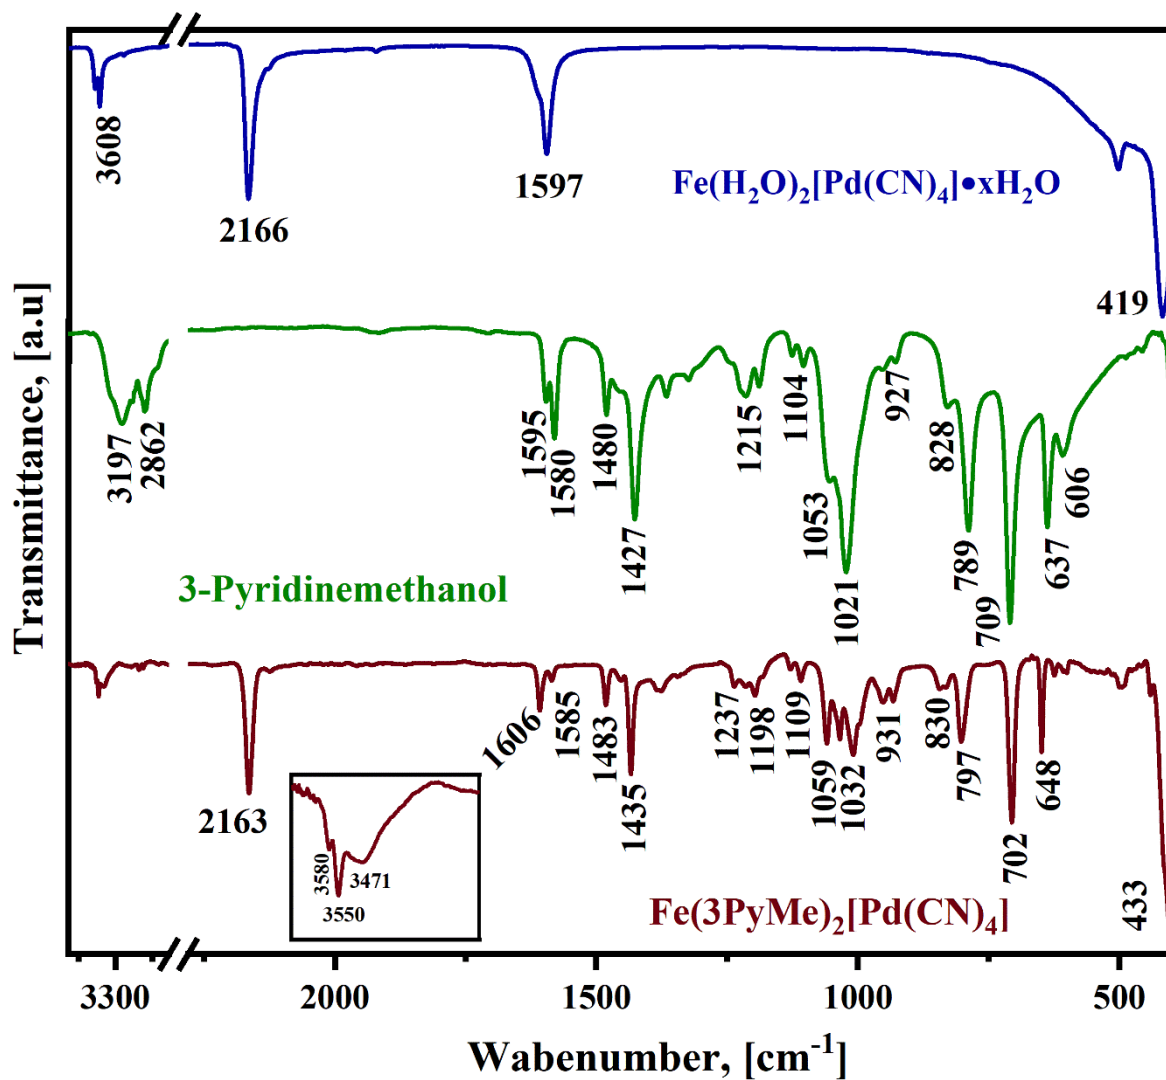

Figure S2. IR spectra for Fe(H<sub>2</sub>O)<sub>2</sub>[Pd(CN)<sub>4</sub>]·xH<sub>2</sub>O; 3-pyridine methanol as a pillar molecule; and the formed solid by incorporation of bimolecular pillars between adjacent layers

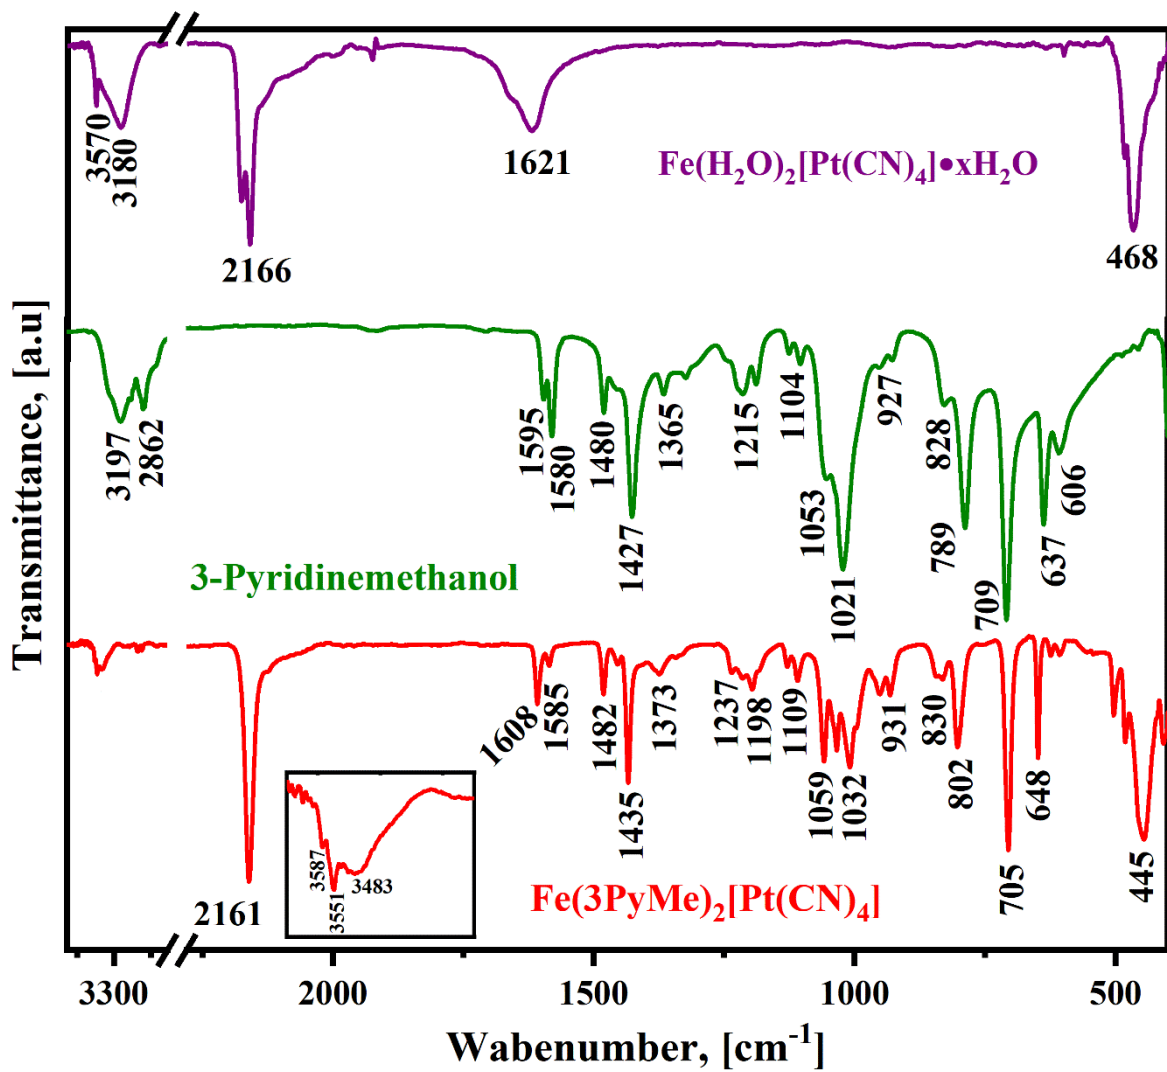

Figure S3. IR spectra for Fe(H<sub>2</sub>O)<sub>2</sub>[Pt(CN)<sub>4</sub>]·xH<sub>2</sub>O; 3-pyridine methanol as a pillar molecule; and the formed solid by incorporation of bimolecular pillars between adjacent layers

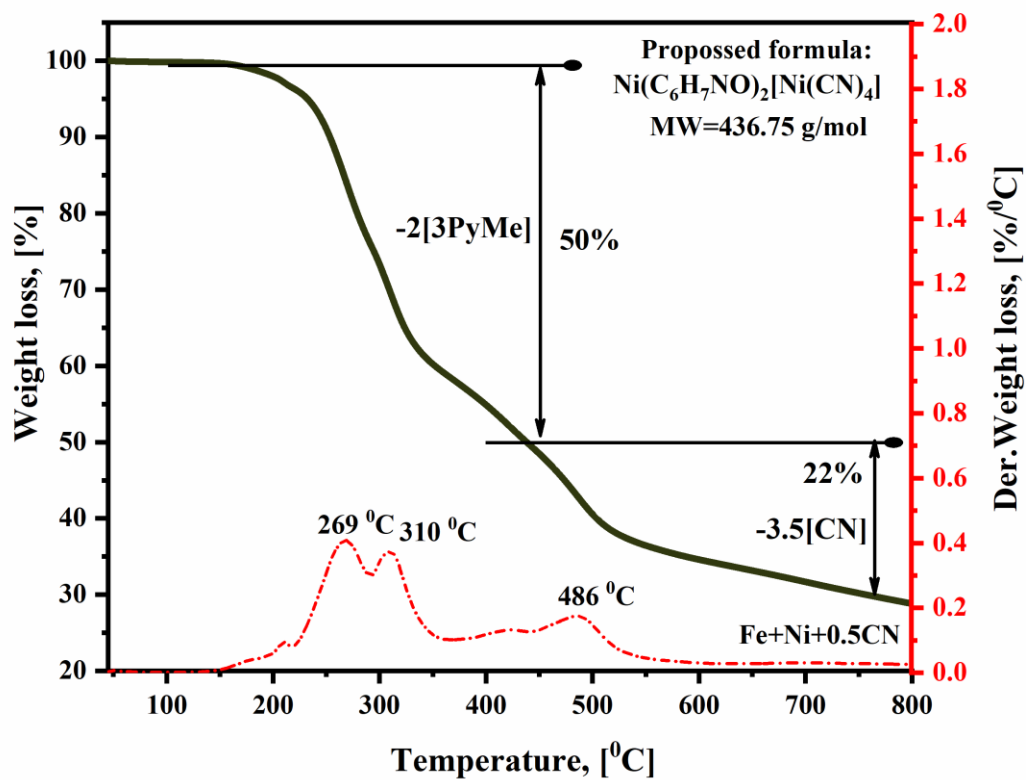

Figure S4. TG curve for the solid formed from the precipitation reaction of aqueous solutions of  $\text{K}_2[\text{Ni}(\text{CN})_4]$ , Mohr salt, and the organic ligand (3PyMe).

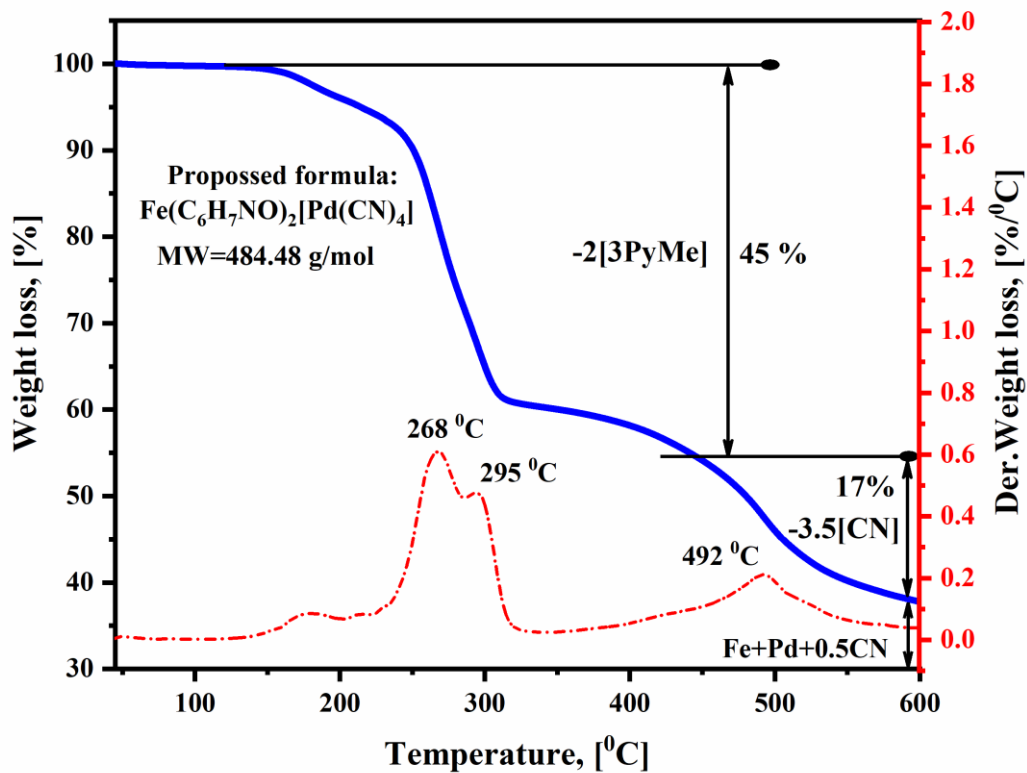

Figure S5. TG curve for the solid formed from the precipitation reaction of aqueous solutions of  $\text{K}_2[\text{Pd}(\text{CN})_4]$ , Mohr salt, and the organic ligand (3PyMe).

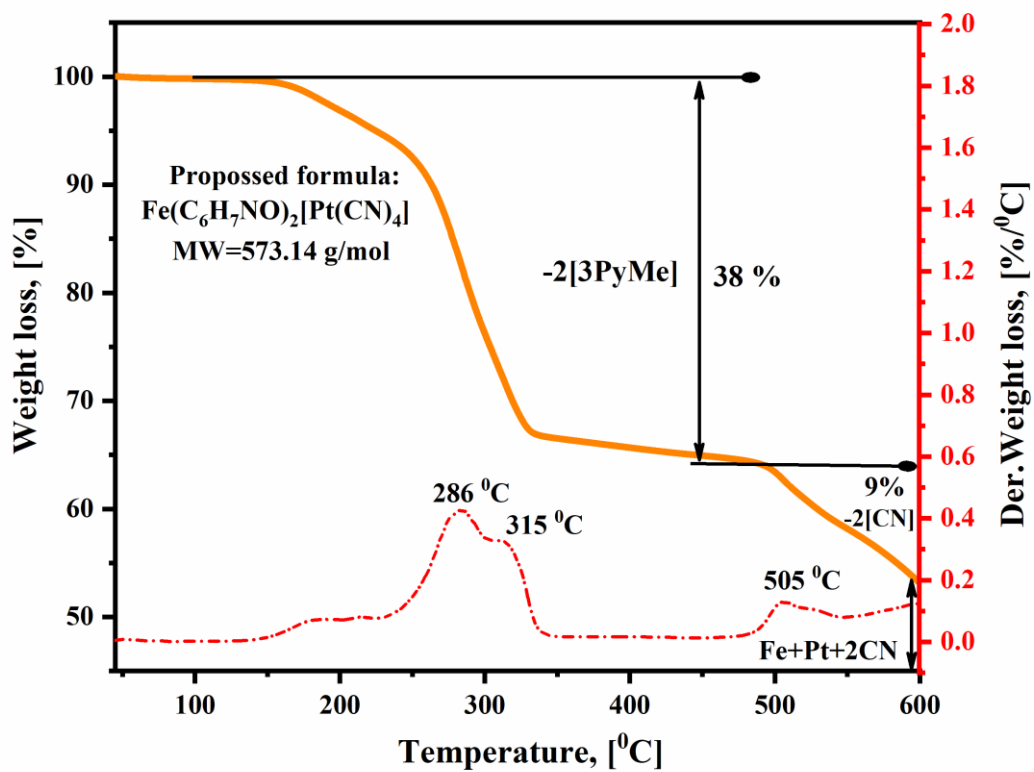

Figure S6. TG curve for the solid formed from the precipitation reaction of aqueous solutions of  $\text{K}_2[\text{Pt}(\text{CN})_4]$ , Mohr salt, and the organic ligand (3PyMe).

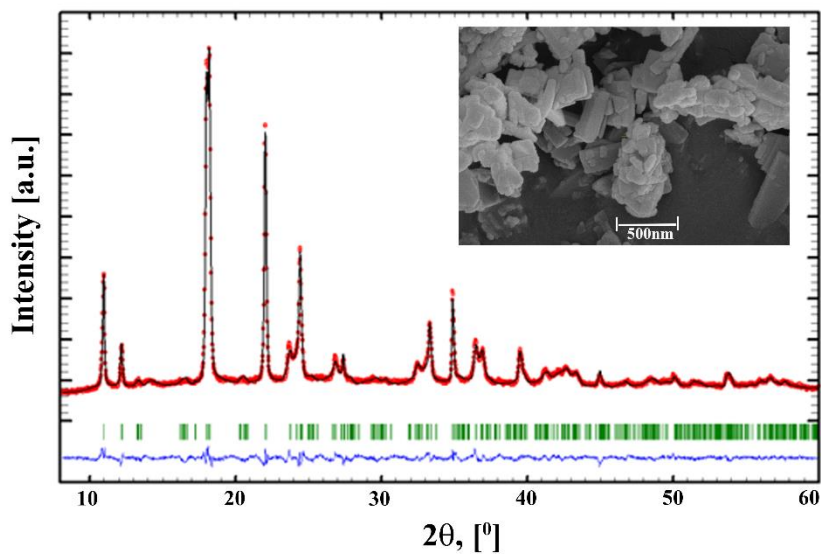

Figure S7. XRD powder pattern experimental (red), calculated (black), and profile fitting difference (blue) for the Rietveld refinement of the composition  $\text{Fe}(\text{3PyMe})_2[\text{Ni}(\text{CN})_4]$  at room temperature. Inset: SEM image of the formed polycrystalline solid with  $M = \text{Ni}$ .

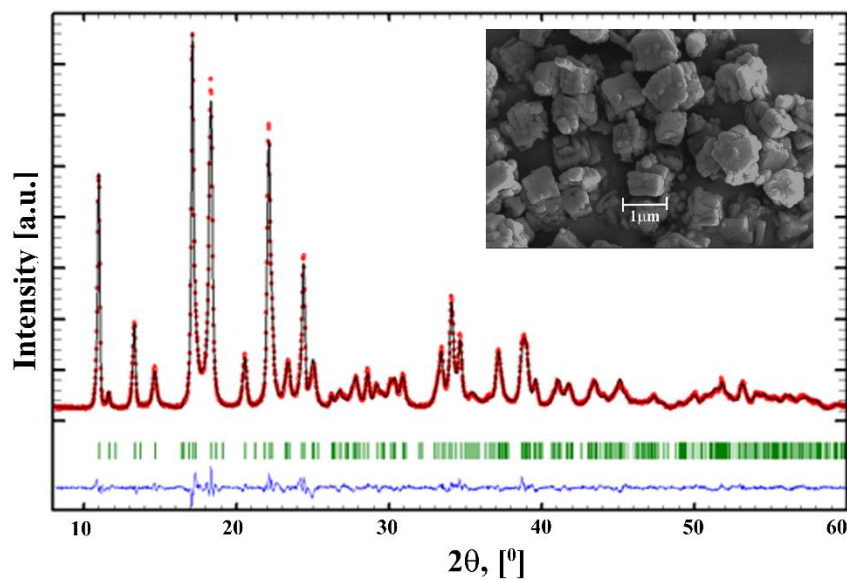

Figure S8. XRD powder pattern experimental (red), calculated (black), and profile fitting difference (blue) for the Rietveld refinement of the composition  $\text{Fe}(\text{3PyMe})_2[\text{Pt}(\text{CN})_4]$  at room temperature. Inset: SEM image of the formed polycrystalline solid with  $M = \text{Pt}$ .

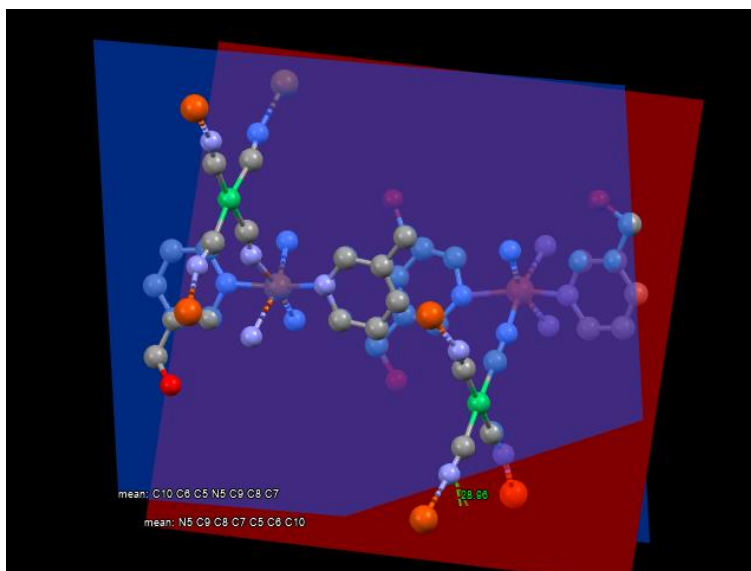

Figure S9. Dihedral angles of the benzene rings for Fe(3PyMe)<sub>2</sub>[Ni(CN)<sub>4</sub>]

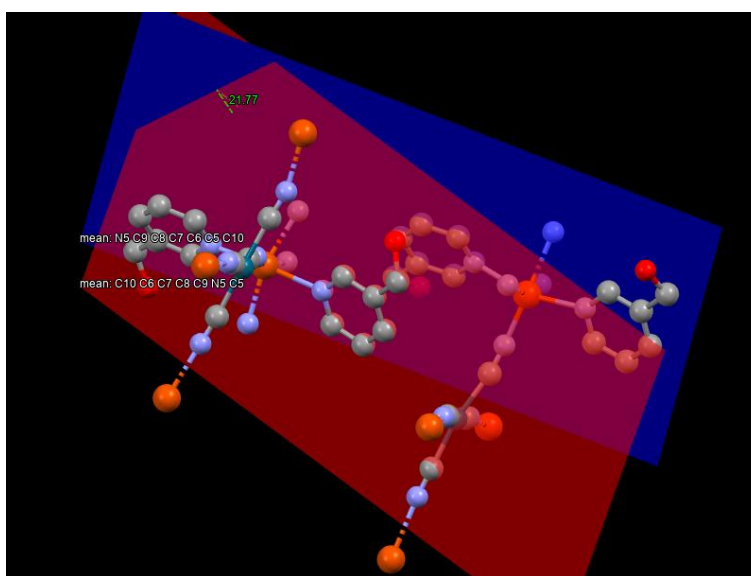

Figure S10. Dihedral angles of the benzene rings for Fe(3PyMe)<sub>2</sub>[Pd(CN)<sub>4</sub>]



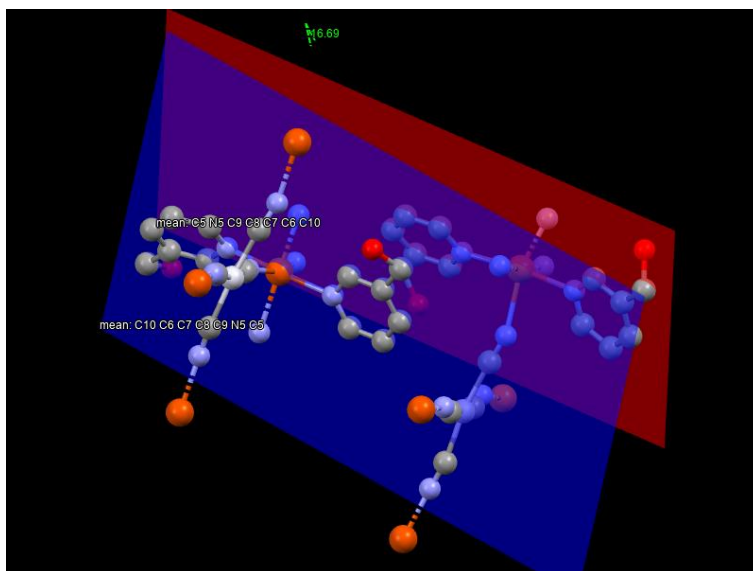

Figure S11. Dihedral angles of the benzene rings for  $\text{Fe}(\text{3PyMe})_2[\text{Pt}(\text{CN})_4]$ .

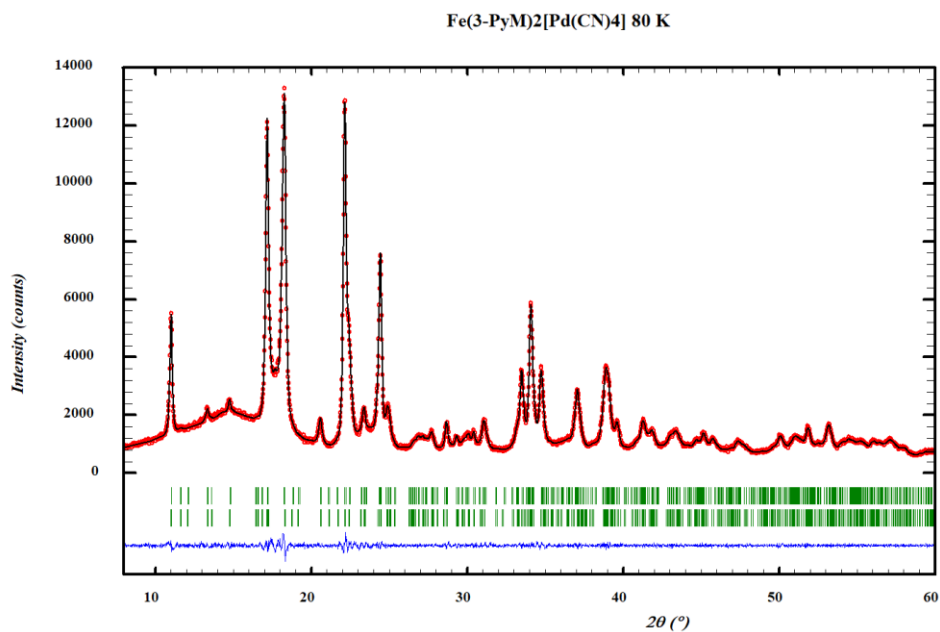

Figure S12. XRD pattern recorded at 80 K for the  $\text{Fe}(\text{3PyMe})_2[\text{Pd}(\text{CN})_4]$  sample, fitted as the superposition of two monoclinic unit cells in the  $P2_1$  space group, corresponding to the HS and LS phases at that temperature.

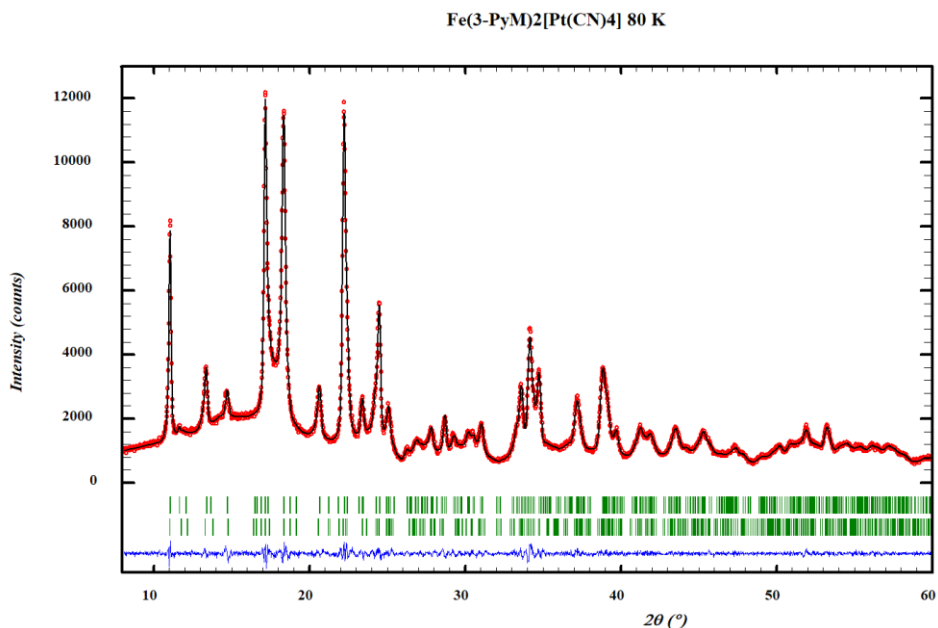

Figure S13. XRD pattern recorded at 80 K for the Fe(3PyMe)<sub>2</sub>[Pt(CN)<sub>4</sub>] sample, fitted as the superposition of two monoclinic unit cells in the  $P2_1$  space group, corresponding to the HS and LS phases at that temperature.

Table S1: Chemical analysis results for the obtained polycrystalline materials

| Sample | %Fe   |       | %M    |       | %C    |       | %N    |       | %O   |      | %H   |      |
|--------|-------|-------|-------|-------|-------|-------|-------|-------|------|------|------|------|
|        | Cal.  | Exp.  | Cal.  | Exp.  | Cal.  | Exp.  | Cal.  | Exp.  | Cal. | Exp. | Cal. | Exp. |
| Ni     | 12.78 | 14.29 | 13.43 | 15.62 | 43.99 | 46.02 | 19.23 | 17.25 | 7.32 | 5.13 | 3.23 | 1.49 |
| Pd     | 11.52 | 13.39 | 21.96 | 22.94 | 39.66 | 40.11 | 17.34 | 18.12 | 6.60 | 4.27 | 2.91 | 1.05 |
| Pt     | 9.74  | 11.26 | 34.03 | 34.56 | 33.52 | 34.17 | 14.66 | 15.29 | 5.58 | 3.21 | 2.46 | 1.19 |

Table S2. Details of the room temperature crystal structures refined by the Rietveld method

| Composition            | Fe(3-PyM) <sub>2</sub> [Ni(CN) <sub>4</sub> ] | Fe(3-PyM) <sub>2</sub> [Pd(CN) <sub>4</sub> ] | Fe(3-PyM) <sub>2</sub> [Pt(CN) <sub>4</sub> ] |
|------------------------|-----------------------------------------------|-----------------------------------------------|-----------------------------------------------|
| <b>Data collection</b> |                                               |                                               |                                               |
| Diffractometer         | Bruker D8 Advanced Eco                        | Bruker D8 Advanced Eco                        | Bruker D8 Advanced Eco                        |
| Wavelength (Å)         | 1.5418                                        | 1.5418                                        | 1.5418                                        |
| 2θ range (°)           | 8.12670-60.01189                              | 8.12670-60.01189                              | 8.12670-60.01189                              |

|                  |          |          |          |
|------------------|----------|----------|----------|
| Step size (°)    | 0.020443 | 0.020443 | 0.020443 |
| Number of points | 2540     | 2540     | 2540     |
| Temperature (K)  | 296(1)   | 296(1)   | 296(1)   |

#### **Crystal data**

|                                         |                                                                   |                                                                    |                                                                    |
|-----------------------------------------|-------------------------------------------------------------------|--------------------------------------------------------------------|--------------------------------------------------------------------|
| Empirical formula                       | C <sub>16</sub> H <sub>14</sub> FeN <sub>6</sub> NiO <sub>2</sub> | C <sub>16</sub> H <sub>14</sub> FeN <sub>6</sub> O <sub>2</sub> Pd | C <sub>16</sub> H <sub>14</sub> FeN <sub>6</sub> O <sub>2</sub> Pt |
| Empirical formula weight                | 436.87                                                            | 484.58                                                             | 573.26                                                             |
| Crystal system                          | Monoclinic                                                        | Monoclinic                                                         | Monoclinic                                                         |
| Space group                             | P 2 <sub>1</sub> [4]                                              | P 2 <sub>1</sub> [4]                                               | P 2 <sub>1</sub> [4]                                               |
| Unit cell dimensions                    | a=7.2527(5) Å<br>b=7.2809(1) Å<br>c=16.1197(4) Å<br>β=91.530(6)°  | a=7.6821(5) Å<br>b=7.3014(6) Å<br>c=16.2751(3) Å<br>β=98.736(1)°   | a=7.6869(4) Å<br>b=7.2881(1) Å<br>c=16.2866(3) Å<br>β=99.433(5)°   |
| Volume (Å <sup>3</sup> )                | 850.92(6)                                                         | 902.28(10)                                                         | 900.09(5)                                                          |
| Z                                       | 2                                                                 | 2                                                                  | 2                                                                  |
| Calculated Density (g/cm <sup>3</sup> ) | 1.705                                                             | 1.784                                                              | 2.115                                                              |
| F(000)                                  | 444.0                                                             | 480.0                                                              | 544.0                                                              |

#### **Refinement**

|                               |        |        |        |
|-------------------------------|--------|--------|--------|
| Effective reflections         | 57     | 71     | 64     |
| Constrain distances           | 8      | 8      | 8      |
| Profile refined parameters    | 14     | 14     | 14     |
| Structural refined parameters | 47     | 47     | 47     |
| Rexp                          | 2.1062 | 3.1511 | 2.7809 |
| Rwp                           | 3.6097 | 5.4717 | 4.7915 |
| Bragg R-factor                | 4.1590 | 2.9452 | 2.7923 |
| Goodness of fit               | 1.714  | 1.736  | 1.723  |

Table S3. Details of the low temperature crystalline phases refined by the Le Bail method

| Composition                   | Fe(3-PyM) <sub>2</sub> [Ni(CN) <sub>4</sub> ]<br>80 K | Fe(3-PyM) <sub>2</sub> [Pd(CN) <sub>4</sub> ]<br>80 K | Fe(3-PyM) <sub>2</sub> [Pt(CN) <sub>4</sub> ]<br>80 K |
|-------------------------------|-------------------------------------------------------|-------------------------------------------------------|-------------------------------------------------------|
| <b><u>Data collection</u></b> |                                                       |                                                       |                                                       |
| Diffractometer                | Bruker D8 Advanced Eco                                | Bruker D8 Advanced Eco                                | Bruker D8 Advanced Eco                                |
| Wavelength (Å)                | 1.5418                                                | 1.5418                                                | 1.5418                                                |
| 2θ range (°)                  | 8.07765-60.00372                                      | 8.11045-60.01199                                      | 8.11515-60.01669                                      |
| Step size (°)                 | 0.012263                                              | 0.018399                                              | 0.018399                                              |

|                                   |                                                                   |                                                                    |                                                                    |
|-----------------------------------|-------------------------------------------------------------------|--------------------------------------------------------------------|--------------------------------------------------------------------|
| Number of points                  | 4236                                                              | 2823                                                               | 2823                                                               |
| Temperature (K)                   | 80(1)                                                             | 80(1)                                                              | 80(1)                                                              |
| <b><u>Crystal data</u></b>        |                                                                   |                                                                    |                                                                    |
| Empirical formula                 | C <sub>16</sub> H <sub>14</sub> FeN <sub>6</sub> NiO <sub>2</sub> | C <sub>16</sub> H <sub>14</sub> FeN <sub>6</sub> O <sub>2</sub> Pd | C <sub>16</sub> H <sub>14</sub> FeN <sub>6</sub> O <sub>2</sub> Pt |
| Empirical formula weight          | 436.87                                                            | 484.58                                                             | 573.26                                                             |
| F(000)                            | 444.0                                                             | 480.0                                                              | 544.0                                                              |
| Z                                 | 2                                                                 | 2                                                                  | 2                                                                  |
| <b><u>Crystalline phase 1</u></b> |                                                                   |                                                                    |                                                                    |
| Crystal system                    | Monoclinic                                                        | Monoclinic                                                         | Monoclinic                                                         |
| Space group                       | P 2 <sub>1</sub> [4]                                              | P 2 <sub>1</sub> [4]                                               | P 2 <sub>1</sub> [4]                                               |
| Unit cell dimensions              | a=7.2594(3) Å<br>b=7.2715(2) Å<br>c=16.0555(3) Å<br>β=92.063(4)°  | a=7.6924(3) Å<br>b=7.2862(2) Å<br>c=16.2059(4) Å<br>β=98.431(8)°   | a=7.6988(2) Å<br>b=7.2660(7) Å<br>c=16.2040(5) Å<br>β=99.199(4)°   |
| Volume (Å <sup>3</sup> )          | 846.97(5)                                                         | 898.51(2)                                                          | 894.79(4)                                                          |
| <b><u>Crystalline phase 2</u></b> |                                                                   |                                                                    |                                                                    |
| Crystal system                    | Monoclinic                                                        | Monoclinic                                                         | Monoclinic                                                         |
| Space group                       | P 2 <sub>1</sub> [4]                                              | P 2 <sub>1</sub> [4]                                               | P 2 <sub>1</sub> [4]                                               |
| Unit cell dimensions              | a=7.2453(4) Å<br>b=7.2863(4) Å<br>c=16.1039(1) Å<br>β=91.582(3)°  | a=7.6999(3) Å<br>b=7.2817(2) Å<br>c=16.2432(1) Å<br>β=98.808(3)°   | a=7.6262(2) Å<br>b=7.3240(3) Å<br>c=16.2584(4) Å<br>β=99.321(3)°   |
| Volume (Å <sup>3</sup> )          | 849.83(3)                                                         | 899.99(3)                                                          | 896.12(4)                                                          |

Table S4. Atomic coordinates, isotropic thermal factors and occupation factors for the refined crystal structures at room temperature

| Composition                                      | Site | x          | y          | z         | Uiso (Å <sup>2</sup> ) | Occ |
|--------------------------------------------------|------|------------|------------|-----------|------------------------|-----|
| <b>Fe(3-PyM)<sub>2</sub>[Ni(CN)<sub>4</sub>]</b> |      |            |            |           |                        |     |
| Fe                                               | 2a   | 0.4966(4)  | 0.5051(4)  | 0.2605(4) | 0.045(2)               | 1   |
| Ni                                               | 2a   | 0.0069(4)  | 0.0036(5)  | 0.2436(5) | 0.042(4)               | 1   |
| C1                                               | 2a   | 0.1871(3)  | 0.1921(5)  | 0.2478(4) | 0.053(4)               | 1   |
| N1                                               | 2a   | 0.3162(4)  | 0.2815(6)  | 0.2410(2) | 0.053(4)               | 1   |
| C2                                               | 2a   | 0.1969(4)  | -0.1704(2) | 0.2449(2) | 0.053(4)               | 1   |
| N2                                               | 2a   | 0.3015(3)  | -0.2853(2) | 0.2336(4) | 0.053(4)               | 1   |
| C3                                               | 2a   | -0.1882(1) | -0.1656(3) | 0.2414(4) | 0.053(4)               | 1   |
| N3                                               | 2a   | -0.3114(2) | -0.2602(1) | 0.2525(3) | 0.053(4)               | 1   |
| C4                                               | 2a   | -0.1635(3) | 0.1973(3)  | 0.2518(4) | 0.053(4)               | 1   |

|      |    |            |           |            |          |   |
|------|----|------------|-----------|------------|----------|---|
| N4   | 2a | -0.2810(4) | 0.3014(4) | 0.2437(5)  | 0.053(4) | 1 |
| N5   | 2a | 0.4600(5)  | 0.4426(3) | 0.3874(3)  | 0.055(3) | 1 |
| C5   | 2a | 0.3158(2)  | 0.4185(4) | 0.4408(4)  | 0.058(3) | 1 |
| H5   | 2a | 0.1991     | 0.3866    | 0.4201     | 0.058    | 1 |
| C6   | 2a | 0.3461(4)  | 0.4420(5) | 0.5251(4)  | 0.058(3) | 1 |
| C7   | 2a | 0.5203(4)  | 0.4897(1) | 0.5551(5)  | 0.058(3) | 1 |
| H7   | 2a | 0.5407     | 0.5056    | 0.6119     | 0.058    | 1 |
| C8   | 2a | 0.6646(4)  | 0.5138(3) | 0.5017(4)  | 0.058(3) | 1 |
| H8   | 2a | 0.7812     | 0.5456    | 0.5224     | 0.058    | 1 |
| C9   | 2a | 0.6342(1)  | 0.4902(3) | 0.4173(3)  | 0.058(3) | 1 |
| H9   | 2a | 0.7301     | 0.5063    | 0.3808     | 0.058    | 1 |
| C10  | 2a | 0.1904(2)  | 0.4164(1) | 0.5843(4)  | 0.058(3) | 1 |
| H10A | 2a | 0.1899     | 0.2909    | 0.6045     | 0.058    | 1 |
| H10B | 2a | 0.2075     | 0.4977    | 0.6316     | 0.058    | 1 |
| O1   | 2a | 0.0198(6)  | 0.4558(5) | 0.5427(4)  | 0.058(3) | 1 |
| H1   | 2a | 0.0691     | 0.5485    | 0.5249     | 0.058    | 1 |
| N6   | 2a | 0.4937(3)  | 0.4833(4) | 0.1397(5)  | 0.055(3) | 1 |
| C11  | 2a | 0.6667(4)  | 0.4644(1) | 0.1067(1)  | 0.058(3) | 1 |
| H11  | 2a | 0.7709     | 0.4571    | 0.1414     | 0.058    | 1 |
| C12  | 2a | 0.6837(3)  | 0.4562(4) | 0.0214(1)  | 0.058(3) | 1 |
| C13  | 2a | 0.5275(1)  | 0.4671(4) | -0.0297(3) | 0.058(3) | 1 |
| H13  | 2a | 0.5389     | 0.4616    | -0.0869    | 0.058    | 1 |
| C14  | 2a | 0.3543(2)  | 0.4860(5) | 0.0037(4)  | 0.058(3) | 1 |
| H14  | 2a | 0.2501     | 0.4934    | -0.031     | 0.058    | 1 |
| C15  | 2a | 0.3372(4)  | 0.4941(2) | 0.0887(5)  | 0.058(3) | 1 |
| H15  | 2a | 0.2216     | 0.5067    | 0.1117     | 0.058    | 1 |
| C16  | 2a | 0.8715(4)  | 0.4355(5) | -0.0158(4) | 0.058(3) | 1 |
| H16A | 2a | 0.8612     | 0.3647    | -0.0666    | 0.058    | 1 |
| H16B | 2a | 0.9206     | 0.5556    | -0.0289    | 0.058    | 1 |
| O2   | 2a | 0.9920(1)  | 0.3451(1) | 0.0419(3)  | 0.058(3) | 1 |
| H2   | 2a | 0.8988     | 0.2929    | 0.0572     | 0.058    | 1 |

| Composition                                      | Site | x          | y          | z         | Uiso (Å <sup>2</sup> ) | Occ |
|--------------------------------------------------|------|------------|------------|-----------|------------------------|-----|
| <b>Fe(3-PyM)<sub>2</sub>[Pd(CN)<sub>4</sub>]</b> |      |            |            |           |                        |     |
| Fe                                               | 2a   | 0.4859(3)  | 0.4760(1)  | 0.2354(4) | 0.046(2)               | 1   |
| Pd                                               | 2a   | 0.0034(3)  | -0.0002(4) | 0.2502(1) | 0.044(2)               | 1   |
| C1                                               | 2a   | 0.1685(4)  | 0.2007(5)  | 0.2315(4) | 0.049(4)               | 1   |
| N1                                               | 2a   | 0.2663(3)  | 0.3166(4)  | 0.2323(2) | 0.049(4)               | 1   |
| C2                                               | 2a   | 0.2032(1)  | -0.1744(2) | 0.2480(5) | 0.049(4)               | 1   |
| N2                                               | 2a   | 0.3089(1)  | -0.2810(4) | 0.2432(3) | 0.049(4)               | 1   |
| C3                                               | 2a   | -0.1992(1) | -0.1719(5) | 0.2502(3) | 0.049(4)               | 1   |
| N3                                               | 2a   | -0.3101(2) | -0.2755(3) | 0.2502(2) | 0.049(4)               | 1   |
| C4                                               | 2a   | -0.1830(2) | 0.1882(6)  | 0.2537(1) | 0.049(4)               | 1   |
| N4                                               | 2a   | -0.2900(5) | 0.2920(2)  | 0.2602(4) | 0.049(4)               | 1   |
| N5                                               | 2a   | 0.5201(5)  | 0.5031(6)  | 0.3752(6) | 0.048(3)               | 1   |
| C5                                               | 2a   | 0.3686(5)  | 0.5063(5)  | 0.4116(6) | 0.053(2)               | 1   |

|      |    |           |           |            |          |   |
|------|----|-----------|-----------|------------|----------|---|
| H5   | 2a | 0.2598    | 0.5282    | 0.3794     | 0.053    | 1 |
| C6   | 2a | 0.3799(4) | 0.4768(2) | 0.4961(1)  | 0.053(2) | 1 |
| C7   | 2a | 0.5427(5) | 0.4446(6) | 0.5434(2)  | 0.053(2) | 1 |
| H7   | 2a | 0.5503    | 0.4248    | 0.6002     | 0.053    | 1 |
| C8   | 2a | 0.6943(1) | 0.4414(2) | 0.5070(5)  | 0.053(2) | 1 |
| H8   | 2a | 0.803     | 0.4196    | 0.5392     | 0.053    | 1 |
| C9   | 2a | 0.6828(4) | 0.4710(4) | 0.4224(3)  | 0.053(2) | 1 |
| H9   | 2a | 0.7839    | 0.4694    | 0.3973     | 0.053    | 1 |
| C10  | 2a | 0.2160(6) | 0.4798(4) | 0.5369(5)  | 0.053(2) | 1 |
| H10A | 2a | 0.1694    | 0.3567    | 0.5389     | 0.053    | 1 |
| H10B | 2a | 0.2445    | 0.5249    | 0.5934     | 0.053    | 1 |
| O1   | 2a | 0.0879(4) | 0.5952(2) | 0.4906(6)  | 0.053(2) | 1 |
| H1   | 2a | 0.0608    | 0.6853    | 0.5159     | 0.053    | 1 |
| N6   | 2a | 0.5330(4) | 0.5000(5) | 0.1031(2)  | 0.048(3) | 1 |
| C11  | 2a | 0.6808(3) | 0.5225(3) | 0.0650(3)  | 0.053(2) | 1 |
| H11  | 2a | 0.7895    | 0.5478    | 0.0966     | 0.053    | 1 |
| C12  | 2a | 0.6657(5) | 0.5068(4) | -0.0206(3) | 0.053(2) | 1 |
| C13  | 2a | 0.5032(4) | 0.4690(6) | -0.0669(5) | 0.053(2) | 1 |
| H13  | 2a | 0.4931    | 0.4585    | -0.1243    | 0.053    | 1 |
| C14  | 2a | 0.3554(5) | 0.4467(2) | -0.0284(2) | 0.053(2) | 1 |
| H14  | 2a | 0.2467    | 0.4215    | -0.06      | 0.053    | 1 |
| C15  | 2a | 0.3703(5) | 0.4621(6) | 0.0569(1)  | 0.053(2) | 1 |
| H15  | 2a | 0.2719    | 0.4472    | 0.0832     | 0.053    | 1 |
| C16  | 2a | 0.8257(1) | 0.5309(5) | -0.0632(1) | 0.053(2) | 1 |
| H16A | 2a | 0.8156    | 0.453     | -0.1119    | 0.053    | 1 |
| H16B | 2a | 0.8333    | 0.657     | -0.0809    | 0.053    | 1 |
| O2   | 2a | 0.9794(5) | 0.4839(5) | -0.0071(4) | 0.053(2) | 1 |
| H2   | 2a | 0.9585    | 0.3958    | 0.021      | 0.053    | 1 |

| Composition                                      | Site | x          | y          | z         | Uiso (Å <sup>2</sup> ) | Occ |
|--------------------------------------------------|------|------------|------------|-----------|------------------------|-----|
| <b>Fe(3-PyM)<sub>2</sub>[Pt(CN)<sub>4</sub>]</b> |      |            |            |           |                        |     |
| Fe                                               | 2a   | 0.5165(4)  | 0.5296(4)  | 0.2634(5) | 0.041(5)               | 1   |
| Pt                                               | 2a   | 0.0018(4)  | 0.0028(4)  | 0.2534(1) | 0.036(5)               | 1   |
| C1                                               | 2a   | 0.1781(1)  | 0.1998(4)  | 0.2442(4) | 0.043(2)               | 1   |
| N1                                               | 2a   | 0.2855(4)  | 0.3000(5)  | 0.2332(4) | 0.043(2)               | 1   |
| C2                                               | 2a   | 0.1969(3)  | -0.1763(2) | 0.2502(5) | 0.043(2)               | 1   |
| N2                                               | 2a   | 0.3222(4)  | -0.2604(2) | 0.2508(5) | 0.043(2)               | 1   |
| C3                                               | 2a   | -0.2026(3) | -0.1673(2) | 0.2467(4) | 0.043(2)               | 1   |
| N3                                               | 2a   | -0.3168(4) | -0.2593(2) | 0.2571(2) | 0.043(2)               | 1   |
| C4                                               | 2a   | -0.1833(2) | 0.1874(6)  | 0.2660(4) | 0.043(2)               | 1   |
| N4                                               | 2a   | -0.2503(2) | 0.3238(5)  | 0.2747(1) | 0.043(2)               | 1   |
| N5                                               | 2a   | 0.5092(5)  | 0.5036(2)  | 0.4018(4) | 0.045(4)               | 1   |
| C5                                               | 2a   | 0.3500(5)  | 0.5242(4)  | 0.4301(6) | 0.047(3)               | 1   |
| H5                                               | 2a   | 0.2465     | 0.5418     | 0.3926    | 0.047                  | 1   |
| C6                                               | 2a   | 0.3461(1)  | 0.5185(5)  | 0.5146(4) | 0.047(3)               | 1   |
| C7                                               | 2a   | 0.5011(3)  | 0.4922(4)  | 0.5700(4) | 0.047(3)               | 1   |

|      |    |           |           |            |          |   |
|------|----|-----------|-----------|------------|----------|---|
| H7   | 2a | 0.4983    | 0.4884    | 0.6268     | 0.047    | 1 |
| C8   | 2a | 0.6603(2) | 0.4716(5) | 0.5416(4)  | 0.047(3) | 1 |
| H8   | 2a | 0.7638    | 0.4541    | 0.5792     | 0.047    | 1 |
| C9   | 2a | 0.6644(1) | 0.4773(6) | 0.4571(5)  | 0.047(3) | 1 |
| H9   | 2a | 0.7707    | 0.4636    | 0.4374     | 0.047    | 1 |
| C10  | 2a | 0.1735(5) | 0.5408(3) | 0.5462(5)  | 0.047(3) | 1 |
| H10A | 2a | 0.1753    | 0.4687    | 0.5964     | 0.047    | 1 |
| H10B | 2a | 0.1567    | 0.6685    | 0.5598     | 0.047    | 1 |
| O1   | 2a | 0.0328(2) | 0.4816(4) | 0.4844(5)  | 0.047(3) | 1 |
| H1   | 2a | 0.0469    | 0.3732    | 0.4735     | 0.047    | 1 |
| N6   | 2a | 0.4961(6) | 0.5372(4) | 0.1313(4)  | 0.045(4) | 1 |
| C11  | 2a | 0.6374(2) | 0.5350(2) | 0.0885(5)  | 0.047(3) | 1 |
| H11  | 2a | 0.7496    | 0.5663    | 0.1153     | 0.047    | 1 |
| C12  | 2a | 0.6101(5) | 0.4857(5) | 0.0054(2)  | 0.047(3) | 1 |
| C13  | 2a | 0.4424(2) | 0.4394(5) | -0.0338(4) | 0.047(3) | 1 |
| H13  | 2a | 0.4242    | 0.4063    | -0.0898    | 0.047    | 1 |
| C14  | 2a | 0.3012(4) | 0.4417(4) | 0.0090(5)  | 0.047(3) | 1 |
| H14  | 2a | 0.189     | 0.4103    | -0.0178    | 0.047    | 1 |
| C15  | 2a | 0.3282(2) | 0.4911(5) | 0.0922(4)  | 0.047(3) | 1 |
| H15  | 2a | 0.2341    | 0.4932    | 0.1215     | 0.047    | 1 |
| C16  | 2a | 0.7627(6) | 0.4824(6) | -0.0424(2) | 0.047(3) | 1 |
| H16A | 2a | 0.8132    | 0.3602    | -0.0405    | 0.047    | 1 |
| H16B | 2a | 0.7215    | 0.5138    | -0.1002    | 0.047    | 1 |
| O2   | 2a | 0.8927(1) | 0.6105(3) | -0.0066(3) | 0.047(3) | 1 |
| H2   | 2a | 0.9569    | 0.644     | 0.0359     | 0.047    | 1 |

Table S5: Selected bond distances and bond angles for the refined crystal structures at room temperature

| Composition                                      | Atoms | Bond distance (Å) | Atoms    | Bond angle (°) |
|--------------------------------------------------|-------|-------------------|----------|----------------|
| <b>Fe(3-PyM)<sub>2</sub>[Ni(CN)<sub>4</sub>]</b> | Ni-C1 | 1.895(5)          | Ni-C1-N1 | 166.1(4)       |
|                                                  | Ni-C2 | 1.872(4)          | Ni-C2-N2 | 169.0(4)       |
|                                                  | Ni-C3 | 1.876(4)          | Ni-C3-N3 | 169.3(6)       |
|                                                  | Ni-C4 | 1.882(4)          | Ni-C4-N4 | 167.4(6)       |
|                                                  | C1-N1 | 1.148(4)          | Fe-N1-C1 | 158.2(4)       |
|                                                  | C2-N2 | 1.147(3)          | Fe-N2-C2 | 159.1(5)       |
|                                                  | C3-N3 | 1.146(2)          | Fe-N3-C3 | 165.7(2)       |
|                                                  | C4-N4 | 1.145(4)          | Fe-N4-C4 | 166.4(7)       |
|                                                  | Fe-N1 | 2.107(5)          |          |                |
|                                                  | Fe-N2 | 2.118(4)          |          |                |
|                                                  | Fe-N3 | 2.210(3)          |          |                |
|                                                  | Fe-N4 | 2.213(4)          |          |                |
|                                                  | Fe-N5 | 2.119(8)          |          |                |
|                                                  | Fe-N6 | 1.953(10)         |          |                |
| <b>Fe(3-PyM)<sub>2</sub>[Pd(CN)<sub>4</sub>]</b> | Pd-C1 | 1.993(4)          | Pd-C1-N1 | 170.7(5)       |

|                                                  |       |           |          |            |
|--------------------------------------------------|-------|-----------|----------|------------|
|                                                  | Pd-C2 | 1.998(3)  | Pd-C2-N2 | 175.2(5)   |
|                                                  | Pd-C3 | 1.999(4)  | Pd-C3-N3 | 177.3(3)   |
|                                                  | Pd-C4 | 1.993(4)  | Pd-C4-N4 | 176.0(4)   |
|                                                  | C1-N1 | 1.130(4)  | Fe-N1-C1 | 166.2(3)   |
|                                                  | C2-N2 | 1.136(3)  | Fe-N2-C2 | 171.22(19) |
|                                                  | C3-N3 | 1.139(3)  | Fe-N3-C3 | 170.0(3)   |
|                                                  | C4-N4 | 1.135(4)  | Fe-N4-C4 | 163.8(5)   |
|                                                  | Fe-N1 | 2.044(3)  |          |            |
|                                                  | Fe-N2 | 2.251(3)  |          |            |
|                                                  | Fe-N3 | 2.386(3)  |          |            |
|                                                  | Fe-N4 | 2.173(4)  |          |            |
|                                                  | Fe-N5 | 2.259(12) |          |            |
|                                                  | Fe-N6 | 2.244(7)  |          |            |
| <b>Fe(3-PyM)<sub>2</sub>[Pt(CN)<sub>4</sub>]</b> | Pt-C1 | 1.997(4)  | Pt-C1-N1 | 172.7(4)   |
|                                                  | Pt-C2 | 1.995(4)  | Pt-C2-N2 | 171.4(3)   |
|                                                  | Pt-C3 | 1.990(4)  | Pt-C3-N3 | 168.3(5)   |
|                                                  | Pt-C4 | 1.993(4)  | Pt-C4-N4 | 161.2(3)   |
|                                                  | C1-N1 | 1.138(4)  | Fe-N1-C1 | 159.2(6)   |
|                                                  | C2-N2 | 1.140(4)  | Fe-N2-C2 | 165.3(3)   |
|                                                  | C3-N3 | 1.139(4)  | Fe-N3-C3 | 165.6(3)   |
|                                                  | C4-N4 | 1.139(5)  | Fe-N4-C4 | 155.9(3)   |
|                                                  | Fe-N1 | 2.431(5)  |          |            |
|                                                  | Fe-N2 | 2.125(4)  |          |            |
|                                                  | Fe-N3 | 2.016(4)  |          |            |
|                                                  | Fe-N4 | 2.321(4)  |          |            |
|                                                  | Fe-N5 | 2.272(10) |          |            |
|                                                  | Fe-N6 | 2.132(10) |          |            |

Table S6. Relevant interatomic distances and angles of the iron atom coordination environment in the  $\text{Fe}(\text{3PyMe})_2[\text{M}(\text{CN})_4]$  series with  $\text{M} = \text{Ni}, \text{Pd},$  and  $\text{Pt}$ .

| <b>Metal</b> | <b>Phase</b>    | <b>Fe–N<sub>3OHPy</sub></b><br>(Å) | <b>Fe–N<sub>CN</sub></b><br>(Å) | <b>Ring-ring</b><br>(Å) | <b>Ring-ring</b><br>(°) |
|--------------|-----------------|------------------------------------|---------------------------------|-------------------------|-------------------------|
| <b>Ni</b>    | HS (296 K), XRD | 2.036(8)                           | 2.162(5)                        | 3.758                   | 28.96                   |
| <b>Pd</b>    | HS (296 K), XRD | 2.201(7)                           | 2.213(4)                        | 3.938                   | 21.77                   |
| <b>Pt</b>    | HS (296 K), XRD | 2.252(10)                          | 2.223(4)                        | 3.676                   | 16.69                   |
